# Supplementary material for: Massive dispersal of Coxiella burnetii among cattle across the United States
Source: PubMed Central journal article supplement (PMC5320587; doi:10.1099/mgen.0.000068), 2016-08-25
Supplement: mgen-02-68-s001.pdf [file mgen-02-68-s001.pdf]

Supplemental Table 1: External genomes

| Strain name | NCBI ID number | Accession number | SRA number | Country of origin | Isolation year | Isolation source             | References                       |
|-------------|----------------|------------------|------------|-------------------|----------------|------------------------------|----------------------------------|
| NMI_RSA493  | 2603970        | SAMN02603970     | n/a        | United States     | 1935           | <i>Dermacentor andersoni</i> | Seshadri, R. et al. (2003).      |
| CbB1        | 2759516        | SAMEA2377214     | ERS407827  | France            | Unknown        | Bovine Placental Cotyledon   | Sidi-Boumedine K. et al. (2014). |
| CbB18       | 2759519        | SAMEA2377215     | ERS407828  | Denmark           | 2008           | Bovine Placental Cotyledon   | Sidi-Boumedine K. et al. (2014). |
| EVCbBK10    | 2759517        | SAMEA2377218     | ERS407831  | Sweden            | 2010           | Bovine Vaginal Swab          | Sidi-Boumedine K. et al. (2014). |

Supplemental Table 2: SNP matrix

| Ref         | Contig   | Position | RSA493 | CbB1 | CbB18 | EVcbBK10 | CMSC1 | ESFL1 | CMCA1 | Branch Name     |
|-------------|----------|----------|--------|------|-------|----------|-------|-------|-------|-----------------|
| NC_004704.1 | 29648114 | 15229    | G      | G    | G     | G        | G     | G     | A     | Br.III.CMCA1    |
| NC_002971.3 | 77358712 | 1715     | C      | C    | C     | C        | C     | C     | T     | Br.III.CMCA1    |
| NC_002971.3 | 77358712 | 43206    | G      | G    | G     | G        | G     | G     | A     | Br.III.CMCA1    |
| NC_002971.3 | 77358712 | 105893   | A      | A    | A     | A        | A     | A     | T     | Br.III.CMCA1    |
| NC_002971.3 | 77358712 | 244314   | G      | G    | G     | G        | G     | G     | A     | Br.III.CMCA1    |
| NC_002971.3 | 77358712 | 289063   | C      | C    | C     | C        | C     | C     | T     | Br.III.CMCA1    |
| NC_002971.3 | 77358712 | 319511   | G      | G    | G     | G        | G     | G     | A     | Br.III.CMCA1    |
| NC_002971.3 | 77358712 | 363985   | C      | C    | C     | C        | C     | C     | T     | Br.III.CMCA1    |
| NC_002971.3 | 77358712 | 390321   | G      | G    | G     | G        | G     | G     | A     | Br.III.CMCA1    |
| NC_002971.3 | 77358712 | 443249   | C      | C    | C     | C        | C     | C     | T     | Br.III.CMCA1    |
| NC_002971.3 | 77358712 | 920619   | A      | A    | A     | A        | A     | A     | T     | Br.III.CMCA1    |
| NC_002971.3 | 77358712 | 948674   | C      | C    | C     | C        | C     | C     | T     | Br.III.CMCA1    |
| NC_002971.3 | 77358712 | 1076230  | C      | C    | C     | C        | C     | C     | T     | Br.III.CMCA1    |
| NC_002971.3 | 77358712 | 1156701  | G      | G    | G     | G        | G     | G     | A     | Br.III.CMCA1    |
| NC_002971.3 | 77358712 | 1273112  | G      | G    | G     | G        | G     | G     | A     | Br.III.CMCA1    |
| NC_002971.3 | 77358712 | 10548    | C      | C    | C     | C        | T     | C     | C     | Br.III.CMSC1    |
| NC_002971.3 | 77358712 | 38100    | C      | C    | C     | C        | T     | C     | C     | Br.III.CMSC1    |
| NC_002971.3 | 77358712 | 87674    | C      | C    | C     | C        | T     | C     | C     | Br.III.CMSC1    |
| NC_002971.3 | 77358712 | 105902   | A      | A    | A     | A        | G     | A     | A     | Br.III.CMSC1    |
| NC_002971.3 | 77358712 | 111833   | G      | G    | G     | G        | A     | G     | G     | Br.III.CMSC1    |
| NC_002971.3 | 77358712 | 597364   | G      | G    | G     | G        | A     | G     | G     | Br.III.CMSC1    |
| NC_002971.3 | 77358712 | 649128   | C      | C    | C     | C        | T     | C     | C     | Br.III.CMSC1    |
| NC_002971.3 | 77358712 | 840079   | C      | C    | C     | C        | T     | C     | C     | Br.III.CMSC1    |
| NC_002971.3 | 77358712 | 988731   | G      | G    | G     | G        | A     | G     | G     | Br.III.CMSC1    |
| NC_002971.3 | 77358712 | 1029226  | G      | G    | G     | G        | A     | G     | G     | Br.III.CMSC1    |
| NC_002971.3 | 77358712 | 1337787  | G      | G    | G     | G        | A     | G     | G     | Br.III.CMSC1    |
| NC_002971.3 | 77358712 | 1496838  | G      | G    | G     | G        | A     | G     | G     | Br.III.CMSC1    |
| NC_002971.3 | 77358712 | 1561439  | G      | G    | G     | G        | A     | G     | G     | Br.III.CMSC1    |
| NC_002971.3 | 77358712 | 1730171  | G      | G    | G     | G        | A     | G     | G     | Br.III.CMSC1    |
| NC_002971.3 | 77358712 | 1807175  | G      | G    | G     | G        | A     | G     | G     | Br.III.CMSC1    |
| NC_002971.3 | 77358712 | 42329    | C      | C    | T     | T        | C     | C     | C     | Br.III.004      |
| NC_002971.3 | 77358712 | 698163   | G      | A    | A     | A        | G     | G     | G     | Br.III.004      |
| NC_002971.3 | 77358712 | 952355   | T      | A    | A     | A        | T     | T     | T     | Br.III.004      |
| NC_002971.3 | 77358712 | 1790016  | C      | T    | T     | T        | C     | C     | C     | Br.III.004      |
| NC_002971.3 | 77358712 | 46914    | T      | C    | T     | T        | T     | T     | T     | Br.III.CbB18    |
| NC_002971.3 | 77358712 | 70046    | G      | A    | G     | G        | G     | G     | G     | Br.III.CbB18    |
| NC_002971.3 | 77358712 | 564575   | T      | C    | T     | T        | T     | T     | T     | Br.III.CbB18    |
| NC_002971.3 | 77358712 | 803805   | T      | C    | T     | T        | T     | T     | T     | Br.III.CbB18    |
| NC_002971.3 | 77358712 | 1022346  | G      | A    | G     | G        | G     | G     | G     | Br.III.CbB18    |
| NC_002971.3 | 77358712 | 1074196  | C      | T    | C     | C        | C     | C     | C     | Br.III.CbB18    |
| NC_002971.3 | 77358712 | 1291059  | G      | A    | G     | G        | G     | G     | G     | Br.III.CbB18    |
| NC_002971.3 | 77358712 | 1343194  | A      | A    | G     | A        | A     | A     | A     | Br.III.CbB18    |
| NC_002971.3 | 77358712 | 1523454  | G      | A    | G     | G        | G     | G     | G     | Br.III.CbB18    |
| NC_002971.3 | 77358712 | 1602030  | A      | A    | G     | A        | A     | A     | A     | Br.III.CbB18    |
| NC_002971.3 | 77358712 | 1886713  | G      | A    | G     | G        | G     | G     | G     | Br.III.CbB18    |
| NC_002971.3 | 77358712 | 52641    | C      | C    | C     | T        | C     | C     | C     | Br.III.EVcbBK10 |
| NC_002971.3 | 77358712 | 138516   | G      | G    | G     | A        | G     | G     | G     | Br.III.EVcbBK10 |
| NC_002971.3 | 77358712 | 208520   | C      | C    | C     | T        | C     | C     | C     | Br.III.EVcbBK10 |
| NC_002971.3 | 77358712 | 229301   | T      | T    | T     | G        | T     | T     | T     | Br.III.EVcbBK10 |
| NC_002971.3 | 77358712 | 439157   | C      | C    | C     | T        | C     | C     | C     | Br.III.EVcbBK10 |
| NC_002971.3 | 77358712 | 826545   | T      | T    | T     | C        | T     | T     | T     | Br.III.EVcbBK10 |
| NC_002971.3 | 77358712 | 1186826  | G      | G    | G     | A        | G     | G     | G     | Br.III.EVcbBK10 |
| NC_002971.3 | 77358712 | 1465623  | T      | T    | T     | C        | T     | T     | T     | Br.III.EVcbBK10 |

|             |          |         |   |   |   |   |   |   |   |              |
|-------------|----------|---------|---|---|---|---|---|---|---|--------------|
| NC_002971.3 | 77358712 | 121018  | C | T | C | C | C | C | C | Br.III.CbB1  |
| NC_002971.3 | 77358712 | 497338  | A | G | A | A | A | A | A | Br.III.CbB1  |
| NC_002971.3 | 77358712 | 529131  | G | A | G | G | G | G | G | Br.III.CbB1  |
| NC_002971.3 | 77358712 | 589646  | C | T | C | C | C | C | C | Br.III.CbB1  |
| NC_002971.3 | 77358712 | 724186  | C | T | C | C | C | C | C | Br.III.CbB1  |
| NC_002971.3 | 77358712 | 872847  | C | T | C | C | C | C | C | Br.III.CbB1  |
| NC_002971.3 | 77358712 | 1077341 | G | A | G | G | G | G | G | Br.III.CbB1  |
| NC_002971.3 | 77358712 | 1143646 | C | T | C | C | C | C | C | Br.III.CbB1  |
| NC_002971.3 | 77358712 | 1516232 | G | A | G | G | G | G | G | Br.III.CbB1  |
| NC_002971.3 | 77358712 | 1562356 | G | A | G | G | G | G | G | Br.III.CbB1  |
| NC_002971.3 | 77358712 | 1697393 | G | A | G | G | G | G | G | Br.III.CbB1  |
| NC_002971.3 | 77358712 | 1729026 | T | C | T | T | T | T | T | Br.III.CbB1  |
| NC_002971.3 | 77358712 | 1868714 | T | C | T | T | T | T | T | Br.III.CbB1  |
| NC_002971.3 | 77358712 | 1971982 | G | A | G | G | G | G | G | Br.III.CbB1  |
| NC_002971.3 | 77358712 | 130935  | A | A | G | G | G | G | G | Br.III.005   |
| NC_002971.3 | 77358712 | 665216  | T | T | T | T | T | C | T | Br.III.ESFL1 |
| NC_002971.3 | 77358712 | 885919  | G | G | G | G | G | C | G | Br.III.ESFL1 |
| NC_002971.3 | 77358712 | 971145  | G | G | G | G | G | A | G | Br.III.ESFL1 |
| NC_002971.3 | 77358712 | 1268947 | G | G | G | G | G | A | G | Br.III.ESFL1 |
| NC_002971.3 | 77358712 | 722599  | T | T | T | T | T | A | A | Br.III.006   |
| NC_002971.3 | 77358712 | 955680  | G | G | G | G | G | A | A | Br.III.006   |
| NC_002971.3 | 77358712 | 1055273 | T | T | T | T | T | C | C | Br.III.006   |
| NC_002971.3 | 77358712 | 1079080 | G | G | G | G | G | A | A | Br.III.006   |
| NC_002971.3 | 77358712 | 1336818 | C | C | C | C | C | T | T | Br.III.006   |
| NC_002971.3 | 77358712 | 1381152 | G | G | G | G | G | A | A | Br.III.006   |
| NC_002971.3 | 77358712 | 1556295 | T | T | T | T | T | C | C | Br.III.006   |
| NC_002971.3 | 77358712 | 1565238 | G | G | G | G | G | A | A | Br.III.006   |
| NC_002971.3 | 77358712 | 1910969 | C | C | C | C | C | T | T | Br.III.006   |
| NC_002971.3 | 77358712 | 1911235 | G | G | G | G | G | A | A | Br.III.006   |

# Supplemental Fig. 1: Branch designations

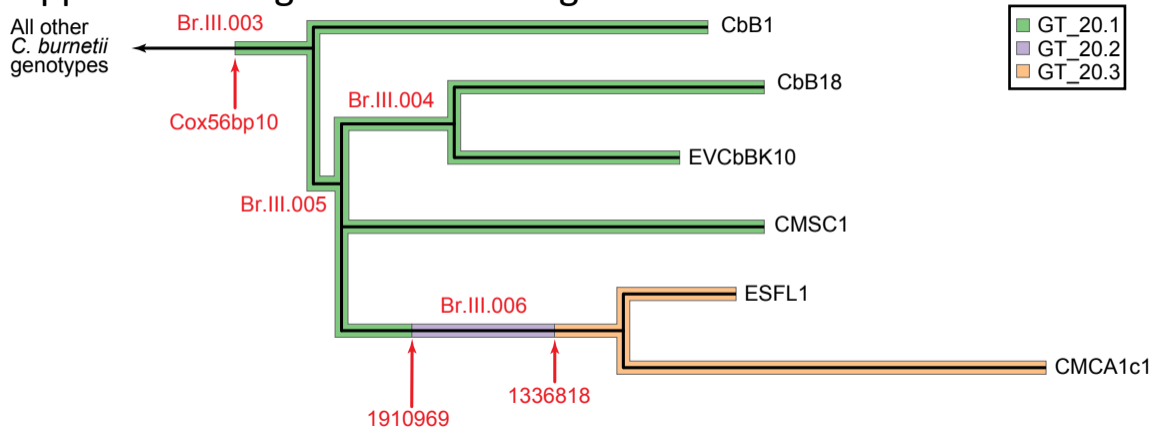

## Appendix A: Assay information: validation and testing for Cox1336818 and Cox1910969

### Summary

The purpose of this document is to report on the validation and testing of two TaqMan assays, Cox1336818 and Cox1910969, designed for subgenotyping of *Coxiella burnetii* ST20 genotypes. These assays (Table 1) provide additional resolution among samples of *C. burnetii* that are sequence type 20 (ST20) [1-3]. Both assays are located on the branch separating the genomes ESFL1 and CMCA1c1 from all other ST20s as well as all other STs of *Coxiella* (Figure 1). We tested the following parameters: precision, limits of quantitation, linearity, selectivity, limits of detection, and robustness. In addition, we compared the  $\Delta C_t$  values between the assays presented here, which target a single copy per genome, to the  $\Delta C_t$  values from an IS1111 assay [4], which targets multiple copies per genome and is used for detecting *C. burnetii*. The goal being to determine at what  $\Delta C_t$  values for IS1111 we see negative amplification with our single-target assays.

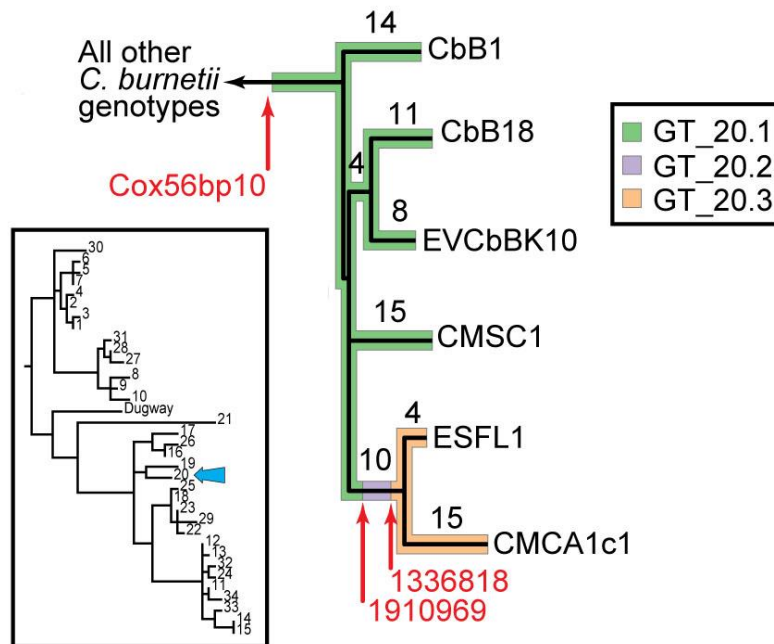

**Figure 1: Phylogenetic tree indicating MST genotypes drawn according to Hornstra et al. [2] and rooted according to Pearson et al. [3] (boxed). The blue arrow indicates the location of ST20 in relation to all other sequence types of *Coxiella*. Enlarged phylogenetic tree for ST20 genomes only is shown. Location of the assays used in this study are indicated; subgenotypes described in the manuscript are indicated by colors on branches. The ancestral to derived SNP change for both assays is C/T.**

## PCR Conditions

Unless otherwise noted in a specific validation test, the following conditions were used for the Cox1910969 assay: 1  $\mu$ L of DNA was added to form a total reaction volume of 10  $\mu$ L that contained 5  $\mu$ L of 2x TaqMan® Universal PCR Master Mix (Life Technologies, CA, USA; p/n 4304437), 0.20  $\mu$ L of each 20  $\mu$ M primer (Table 1), 0.10  $\mu$ L of the 20  $\mu$ M FAM MGB-NFQ probe (Table 1), 0.15  $\mu$ L of the 20  $\mu$ M VIC MGB-NFQ probe (Table 1), and 3.35  $\mu$ L of sterile, molecular grade water. For the Cox1336818 assay, reaction conditions were identical to those above but with the following exceptions: 0.06  $\mu$ L of each 20  $\mu$ M MGB-NFQ probe (Table 1) and 3.48  $\mu$ L of sterile, molecular grade water were added. Unless otherwise specified in this document, thermal cycling conditions for both assays were as follows: 50°C for 2 min., 95°C for 10 min., followed by 45 cycles of 95°C for 15 sec., and 60°C for 1 min. PCR was performed on an Applied Biosystems 7900HT Fast real-time PCR system with SDS v2.4 software. All data were analyzed using SDS v2.4 software with a manual threshold of 0.1 and an automatic baseline.

**Table 1: Primers and Probes for the Cox1336818 and Cox1910969 assays.**

| Assay Name | Primer and Probe Names | Primer and Probe Sequences 5' → 3' | SNP State Ancestral/Derived |
|------------|------------------------|------------------------------------|-----------------------------|
| Cox1336818 | Cb1336818 F            | GGGTTCCAATAGCGAGTTTGAT             | C/T                         |
|            | Cb1336818 R            | TGACTGATATAACCATGCGTCAACT          |                             |
|            | Cb1336818_VIC_T        | VIC-AACACCAGCTTTCAG-MGBNFQ         |                             |
|            | Cb1336818_FAM_C        | 6FAM-AACACCAGCTTCCAG-MGBNFQ        |                             |
| Cox1910969 | Cb1910969 F            | ATCAGAACCTTCACTCGATTCTGC           | C/T                         |
|            | Cb1910969 R            | AATGCTATTCGTTATGCGAAGAATG          |                             |
|            | Cb1910969_VIC_T        | VIC-TTGAATACGAATGTTG-MGBNFQ        |                             |
|            | Cb1910969_FAM_C        | 6FAM-ATTGAATACGAACGTTG-MGBNFQ      |                             |

## Part I – Precision, Limits of Quantitation, and Linearity

The precision, limits of quantitation, and linearity of both *Coxiella* assays were measured using a single plate setup for each assay. For both assays, a panel consisting of a ten-fold serial dilution series of whole-genome amplified (WGA) product from two ancestral and two derived templates were used. Eleven dilution points were made with point one having the highest DNA concentration (i.e. WGA product that would yield a Ct (cycle threshold) of ~20) and point 11 the lowest DNA concentration (i.e.  $1 \times 10^{10}$  dilution of point 1). Four assay replicates were used for each template (ancestral and derived) at every dilution point (points 1-11); 16 negative template controls were also used.

### ***Precision***

Precision, or agreement among multiple replicates of a sample, was measured for each dilution point by 1) examination of the  $C_T$  standard deviation (SD) among the four replicates at each dilution point and 2) observation of the amount of positive amplifications per dilution point. Standard deviations ranged from 0-1.82  $C_T$ s for both assays. Amplification of all replicates only occurred out to the 5<sup>th</sup> or 6<sup>th</sup> dilution points, depending on the assay (Figure 2). There was no amplification in negative template controls. Cross hybridization between the ancestral and derived probes was observed for the Cox1336818 assay only, but the difference in  $C_T$  between the allele-specific signal and the mismatch signal was always greater than 2.81  $C_T$ s and therefore large enough to provide discriminatory ability (Figure 2). The assays were precise, therefore, out to the 5<sup>th</sup> or 6<sup>th</sup> dilutions when the original template had a starting  $C_T$  of ~20. SNP genotyping calls for ancestral and derived WGA templates were 100% accurate at all dilution points which had amplification.

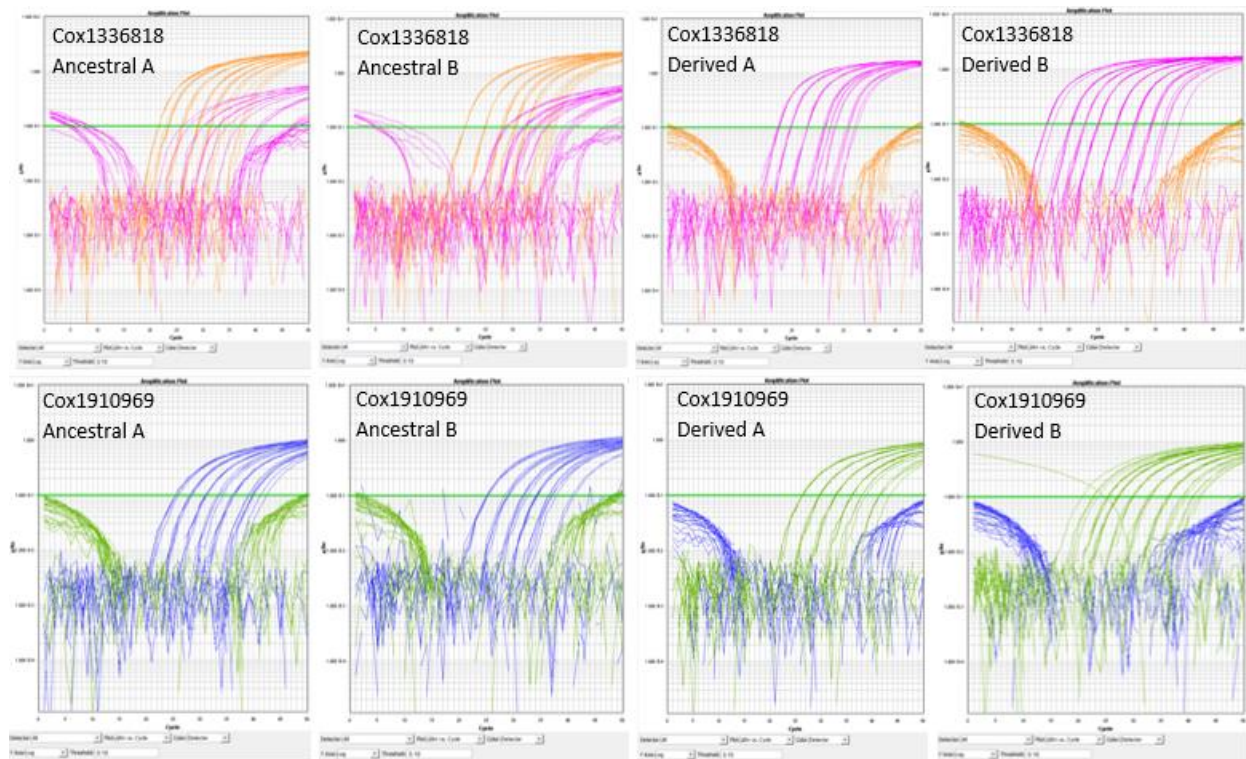

**Figure 2: Precision of Cox1336818 and Cox1910969. For Cox1336818, amplification of the ancestral probe (SNP C) is shown in orange while amplification of the derived probe (SNP T) is shown in pink. For Cox1910969, amplification of the ancestral probe (SNP C) is shown in blue while amplification of the derived probe (SNP T) is shown in green.**

### ***Limits of Quantitation***

Limits of quantitation, or the lowest and highest concentrations of target DNA that can be measured with reasonable precision and accuracy, were measured by looking at the amount of

correct SNP calls at each dilution point. As SNP calls were 100% accurate and there was no amplification of NTCs, the limits of quantitation were determined by the precision of each assay, which were accurate out to the 5<sup>th</sup> or 6<sup>th</sup> dilutions when the original template has a C<sub>T</sub> of ~20. In many cases, SNP calls were also accurately made at dilutions 7-9 (approximately C<sub>T</sub>s of 36), with only one or two replicates of four amplifying. The upper limit of quantitation was undetermined as we did not test samples more concentrated than dilution point 1.

### Linearity

Linearity, or the ability to elicit results proportional to the concentration of target DNA in the sample, was measured by plotting the average C<sub>T</sub> across all amplifying replicates, per dilution point, per template, per assay and attributing r<sup>2</sup> values to the range of the linear dilutions (Figures 3 and 4). The difference in the average C<sub>T</sub> values from one dilution point to the next ranged from 1.13 to 3.91 for both assays. The r<sup>2</sup> values for both assays where the linear range was determined was ≥0.9904. As we were able to determine a range where the change in C<sub>T</sub> values per ten-fold dilution increases by ~ 3.0 C<sub>T</sub>s and the r<sup>2</sup> values in this range are ≥0.9904, we can say that each assay has a linear range. For Cox1336818, the linear range of the assay falls between ~22-37 C<sub>T</sub>s (Fig. 3). For Cox1910969 the linear range of the assay falls between ~26-39 C<sub>T</sub>s (Fig. 4).

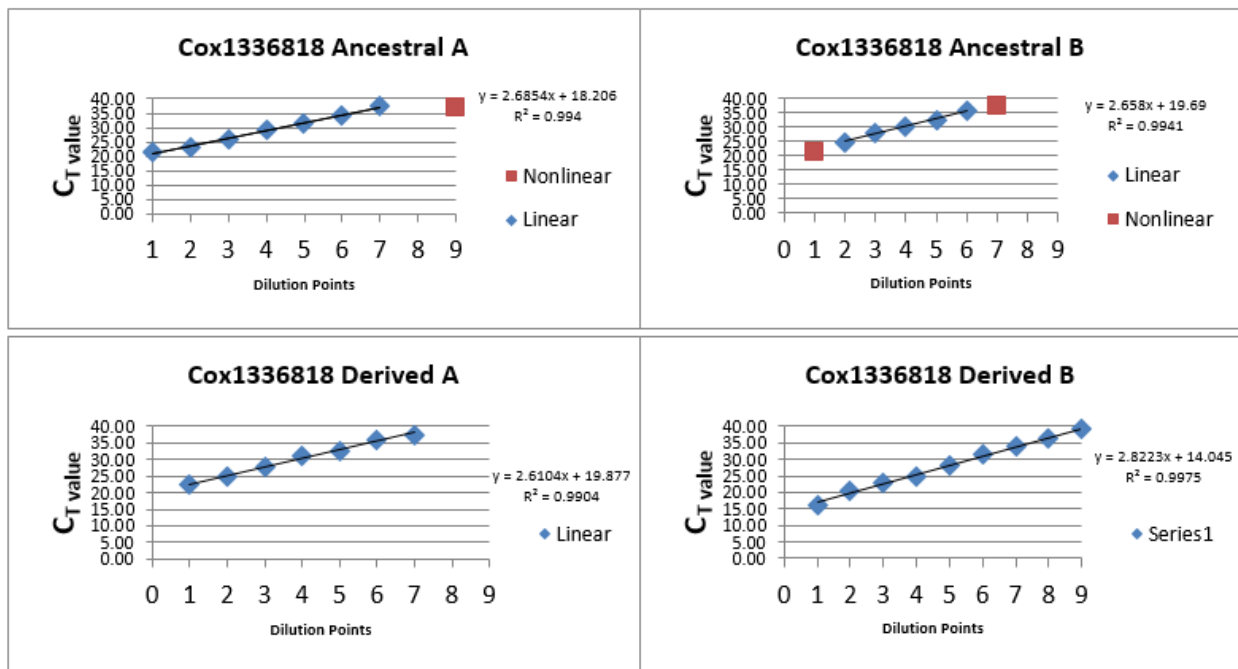

**Figure 3: Plots of the average C<sub>T</sub> value of all amplifying replicates out of four replicates, per template, per assay, for Cox1336818. For each plot, the x-axis indicates the dilution point used, (dilution 1 being the most concentrated sample and all other points being consecutive ten-fold serial dilutions from point 1); the y-axis is the average C<sub>T</sub> value of all amplifying replicates. Linear dilution points are plotted as blue diamonds. Nonlinear replicates are plotted as red squares.**



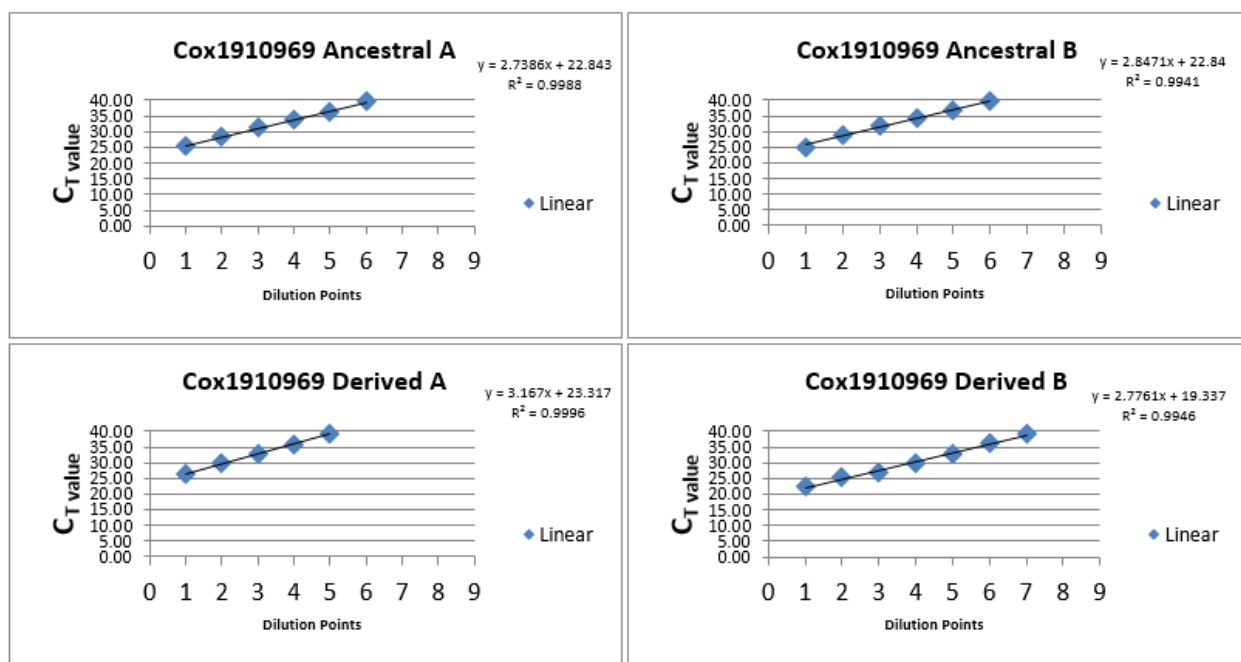

**Figure 4: Plots of the average  $C_T$  value of all amplifying replicates out of four replicates, per template, per assay, for Cox1910969. For each plot, the x-axis indicates the dilution point used, (dilution 1 being the most concentrated sample and all other points being consecutive ten-fold serial dilutions from point 1); the y-axis is the average  $C_T$  value of all amplifying replicates.**

## Part II – Selectivity

To test selectivity, or the ability to accurately genotype in the presence of mixed samples, one ancestral and one derived WGA template (point 1 from Part I above) were used. Mixtures of ancestral:derived template were combined at ratios of 10:90, 25:75, 50:50, 75:25, and 90:10 to test the selectivity of each assay. Un-mixed samples were used as positive template controls; molecular grade water was used as a negative template control. Four replicates were tested for each control or mixture for each assay. The  $\Delta C_T$  between the ancestral and derived probes was calculated for all replicates and the mixed and control samples were compared.

For both assays, the positive template controls (unmixed samples) did not show any cross hybridization of probes (Figure 5, panels “100 % Ancestral” and “100% Derived”). The mixtures had  $\Delta C_T$  values ranging from 0.78 to 3.93  $C_T$ s. The 50:50 mixtures did not have an average  $\Delta C_T$  value of zero as would be expected if they were exactly 50:50 and/or the binding efficiencies of the probes were equal (Figure 5 panels “50:50 ANC/DER”). Both assays appear to skew towards the ancestral SNP state (FAM-labeled probe for both assays) in mixtures as the 25:75 mixtures were called as ancestral despite the fact that there should have been much more derived template in the mixtures (Figure 5). This should not affect the ability of the assays to accurately detect the presence of mixtures in samples when accurate ancestral and derived controls are used to provide

a reference point when evaluating mixtures. It does, however, preclude the ability for these assays to be used to accurately estimate the ratio of mixtures in a sample.

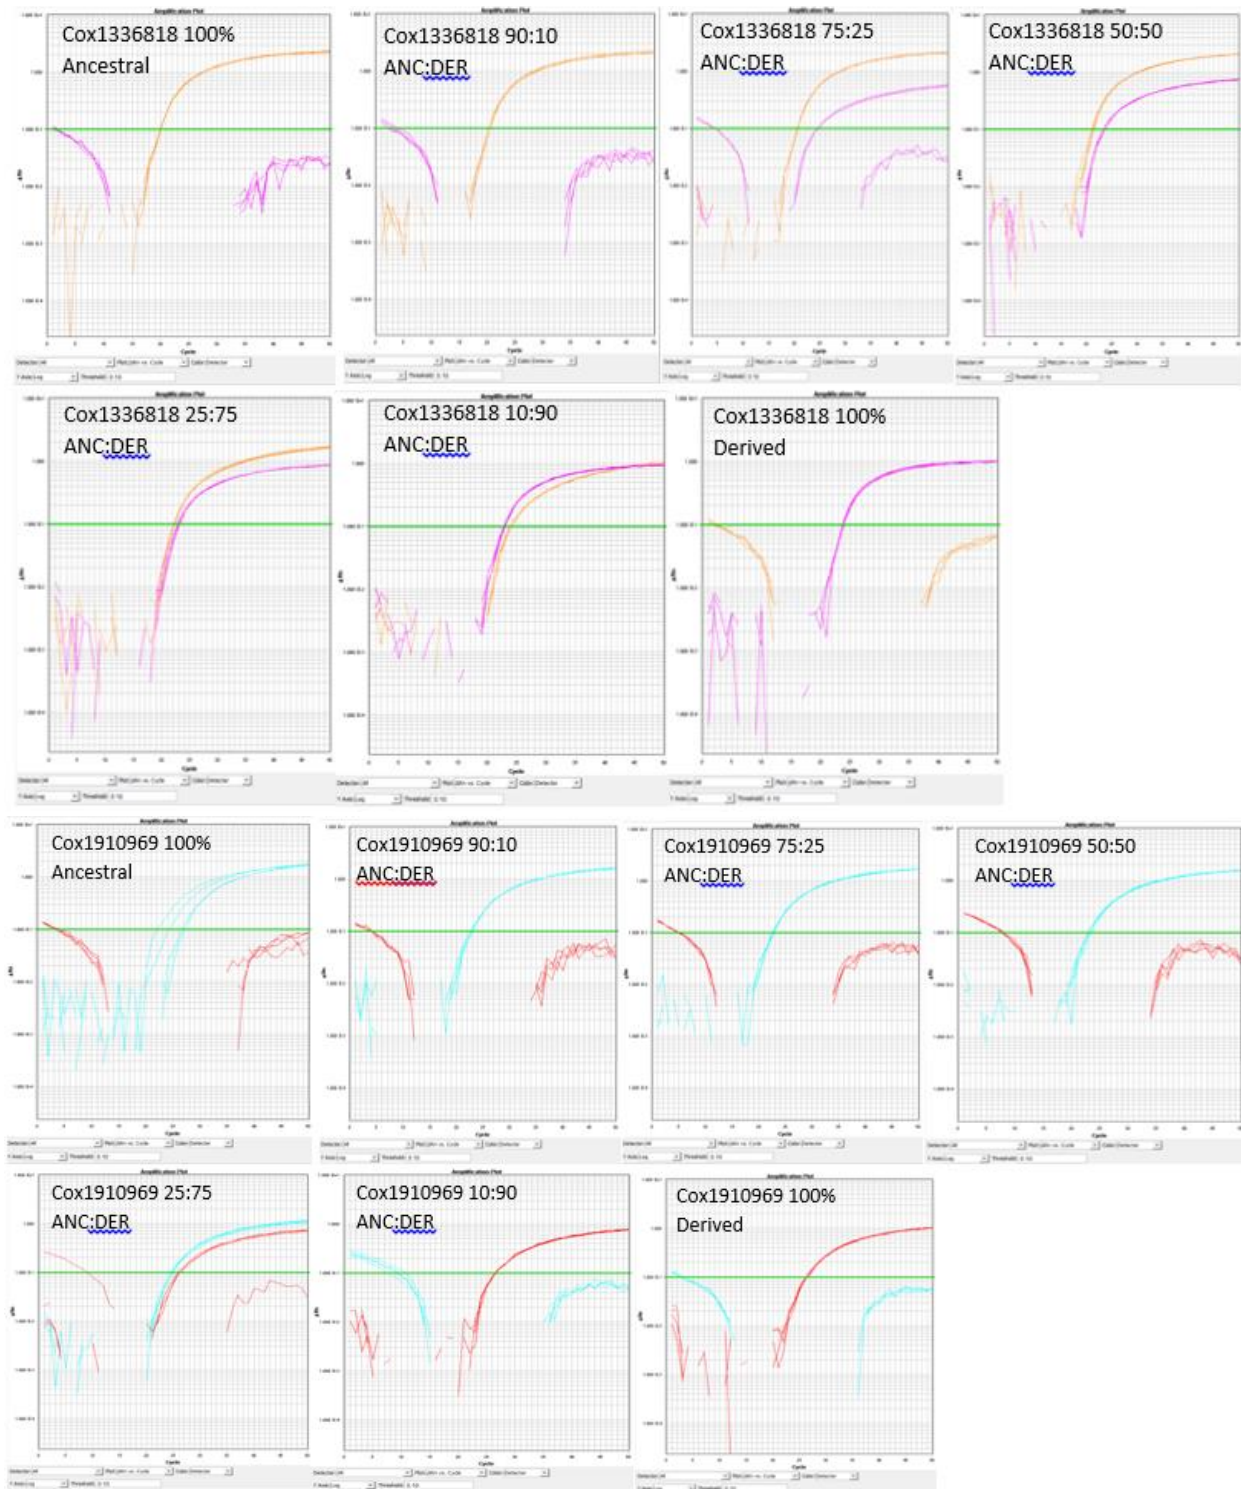

**Figure 5: Selectivity of Cox1336818 and Cox1910969. Amplification plots include unmixed template and mixtures of ancestral:derived (ANC:DER) template. For Cox1336818,**

amplification of the ancestral probe (SNP C, labeled with the FAM reporter) is shown in orange while amplification of the derived probe (SNP T, labeled with a VIC reporter) is shown in pink. For Cox1910969, amplification of the ancestral probe (SNP C, labeled with a FAM reporter) is shown in blue while amplification of the derived probe (SNP T, labeled with a VIC reporter) is shown in red.

### Part III – Limits of Detection

The limits of detection, or the concentration at which amplification of one more replicates occurs, was measured for ancestral and derived probes in both *Coxiella* assays by testing six dilution points from Part I. The six dilution points were: two points that have successful amplification (all four replicates amplified in Part I) two points that have spotty amplification (less than four replicates amplified in Part I), and two points that failed to amplify (no amplification in Part I). Twenty-four replicates were tested for each ancestral and derived template at each of the six points selected; Twenty-four negative template controls were also tested. The points from Part I chosen for each assay per derived and ancestral templates are given in Table 2.

The limits of detection (LOD) were measured by counting the number of replicates out of 24 which amplified for each point chosen, per template, per assay (Table 2). The LOD for both assays varied: for Cox1336818 the LOD occurred at point 7 for both probes with the ancestral probe amplifying 5/24 replicates and the derived probe amplifying 3/24 replicates (Table 2). For assay Cox1910969, the LOD varied by probe with the ancestral probe’s LOD being point 6 (11/24 replicates) and the derived probes LOD = point 5 (3/24 replicates). No NTCs amplified for either assay.

**Table 2: Summary of amplifications per sample for testing the Limits of Detection (LOD) for Cox1336818 and Cox1910969. For the column category: “succ” refers to dilution points where all four replicates amplified in Part I, “spotty” refers to dilution points where less than four replicates amplified in Part I and “fail” refers to dilution points where no replicates amplified in Part I. “Amp (+)” refers to the number of positive amplifications out of 24 replicates for the relevant probe/template. Red cells indicate that there was no amplification out of 24 replicates. Orange cells indicate that there were less than 24 replicates amplifying. Green cells indicate that all 24 replicates successfully amplified.**

| Cox1336818      |          |                            |          |         | Cox1910969      |          |                            |          |         |
|-----------------|----------|----------------------------|----------|---------|-----------------|----------|----------------------------|----------|---------|
| Sample Genotype | Category | Dilution point from Part I | SNP Call | amp (+) | Sample Genotype | Category | Dilution point from Part I | SNP Call | amp (+) |
| Ancestral       | fail2    | 11                         | UND      | 0       | Ancestral       | fail2    | 7                          | UND      | 0       |
| Ancestral       | fail1    | 9                          | UND      | 0       | Ancestral       | fail1    | 6                          | C        | 11      |
| Ancestral       | spotty2  | 7                          | C        | 5       | Ancestral       | spotty2  | 5                          | C        | 14      |
| Ancestral       | spotty1  | 6                          | C        | 18      | Ancestral       | spotty1  | 4                          | C        | 24      |
| Ancestral       | succ2    | 5                          | C        | 21      | Ancestral       | succ2    | 2                          | C        | 24      |
| Ancestral       | succ1    | 1                          | C        | 24      | Ancestral       | succ1    | 1                          | C        | 24      |
| Derived         | fail2    | 11                         | UND      | 0       | Derived         | fail2    | 7                          | UND      | 0       |
| Derived         | fail1    | 9                          | UND      | 0       | Derived         | fail1    | 6                          | UND      | 0       |
| Derived         | spotty2  | 8                          | UND      | 0       | Derived         | spotty2  | 5                          | T        | 3       |
| Derived         | spotty1  | 7                          | T        | 3       | Derived         | spotty1  | 4                          | T        | 15      |
| Derived         | succ2    | 6                          | T        | 15      | Derived         | succ2    | 2                          | T        | 22      |
| Derived         | succ1    | 1                          | T        | 24      | Derived         | succ1    | 1                          | T        | 24      |
| neg             | NA       |                            | UND      | 0       | neg             | NA       |                            | UND      | 0       |

#### Part IV - Robustness

The robustness of each assay, or the ability for the assay to amplify and genotype samples correctly at different annealing temperatures, was tested by taking three dilution points of an ancestral and derived WGA template determined from the results of Part I to be spotty (see also Part III) plus two, ten-fold dilution points after that and testing them with three different annealing temperatures. Four replicates were run for each dilution point along with eight NTCs, per assay. The annealing temperatures tested were  $\pm 5^\circ\text{C}$  from  $60^\circ\text{C}$  and including  $60^\circ\text{C}$ . When tested with the standard temperature of  $60^\circ\text{C}$ , results were as expected (samples genotyped correctly) and little to no cross-hybridization was observed (Figure 6). When the annealing temperature was decreased to  $55^\circ\text{C}$ , the specificity of the probes was reduced for both assays, thus increasing cross hybridization of the probes (Figure 6) making genotyping of samples more ambiguous. When tested with an annealing temperature of  $65^\circ\text{C}$ , the assays failed entirely across all samples; no amplification was observed (data not shown). In summary, these assays are not very robust to changes in annealing temperature and therefore PCR should always be performed with an annealing temperature of  $60^\circ\text{C}$ .

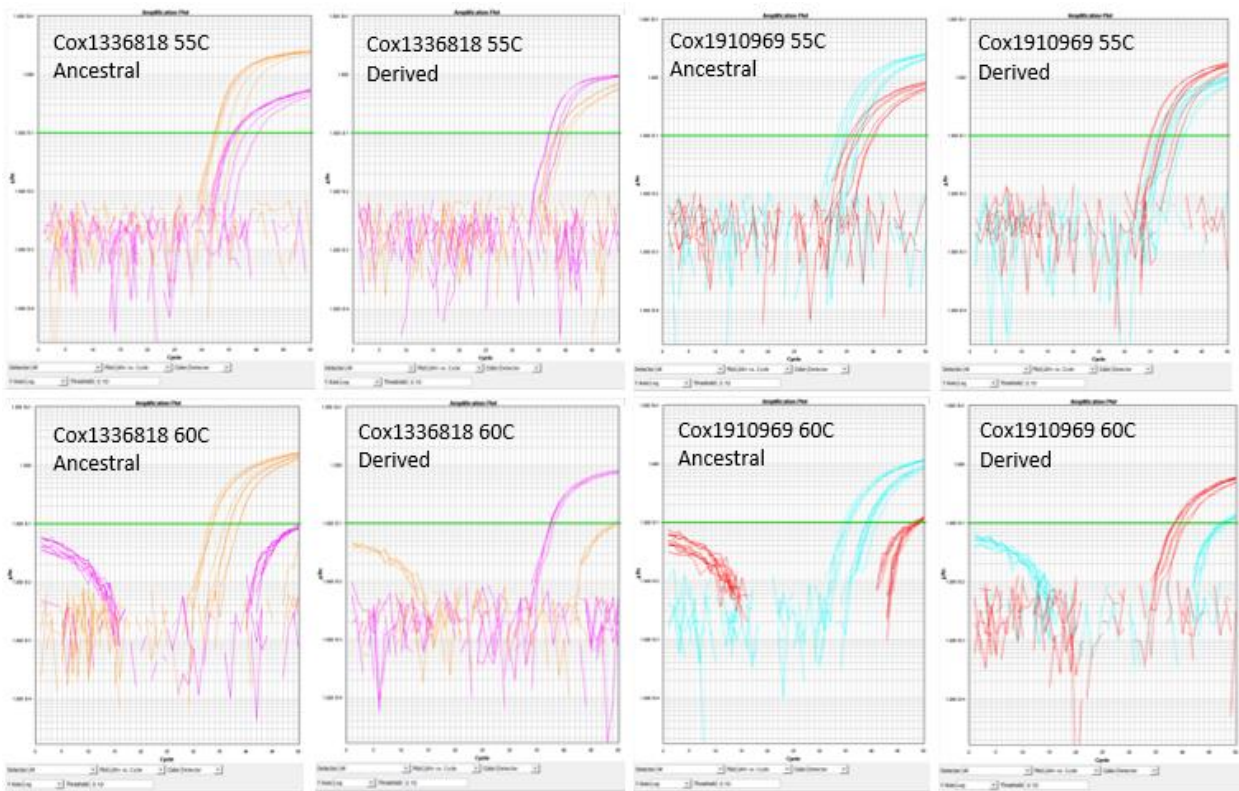

**Figure 6: Robustness of the assays Cox1336818 and Cox1910969 to changes in annealing temperatures. Amplification plots include Cox1336818 and Cox1910969 at annealing temperatures of  $55^\circ\text{C}$  and  $60^\circ\text{C}$ . For Cox1336818, amplification of the ancestral probe (SNP C) is shown in orange while amplification of the derived probe (SNP T) is shown in**

pink. For Cox1910969, amplification of the ancestral probe (SNP C) is shown in blue while amplification of the derived probe (SNP T) is shown in red.

### Part V - IS1111 Comparison

As an additional test of these assays, a comparison between the *Coxiella*-specific detection assay, IS1111 [4], and our genotyping assays was done in order to determine the  $C_T$  value cut-off at which *Coxiella burnetii* DNA can be detected in a sample with IS1111 but no longer genotyped by our assays. For this comparison, we used all dilution points from Part I (described above) and plotted the average  $C_T$  of all amplifying replicates (per template, per probe,) along with the average  $C_T$  of the sample replicates when tested with IS1111. When running the IS1111 assay all SDS v2.4 settings were left as automatic and PCR was performed according to [4]. As shown in the plots below (Fig. 7), the last  $C_T$  value where IS1111 amplifies and where genotyping results are obtained for each assay varies from a  $C_T$  value of 29.96 to 35.65. This implies possible genotyping failures with our assay for samples that have an IS1111  $C_T$  value  $\sim 30$  or greater and likely genotyping failures with a  $C_T$  value above 35.65 (fig. 7). We would expect that genotyping failures with these two assays will increase and/or occur at a lower  $C_T$  value when the isolates being tested have a greater number of copies of IS1111 per genome. The tests below were performed using whole genome amplified product from strains CMSC1 and Q154 for the ancestral templates and ESFL1 and CMCA1c1 for the derived templates. We estimate that CMSC1, ESFL1, and CMCA1c1 have  $\sim 25$  copies of IS1111, per genome and Q154 has  $\sim 46$  copies, per genome (data not shown).

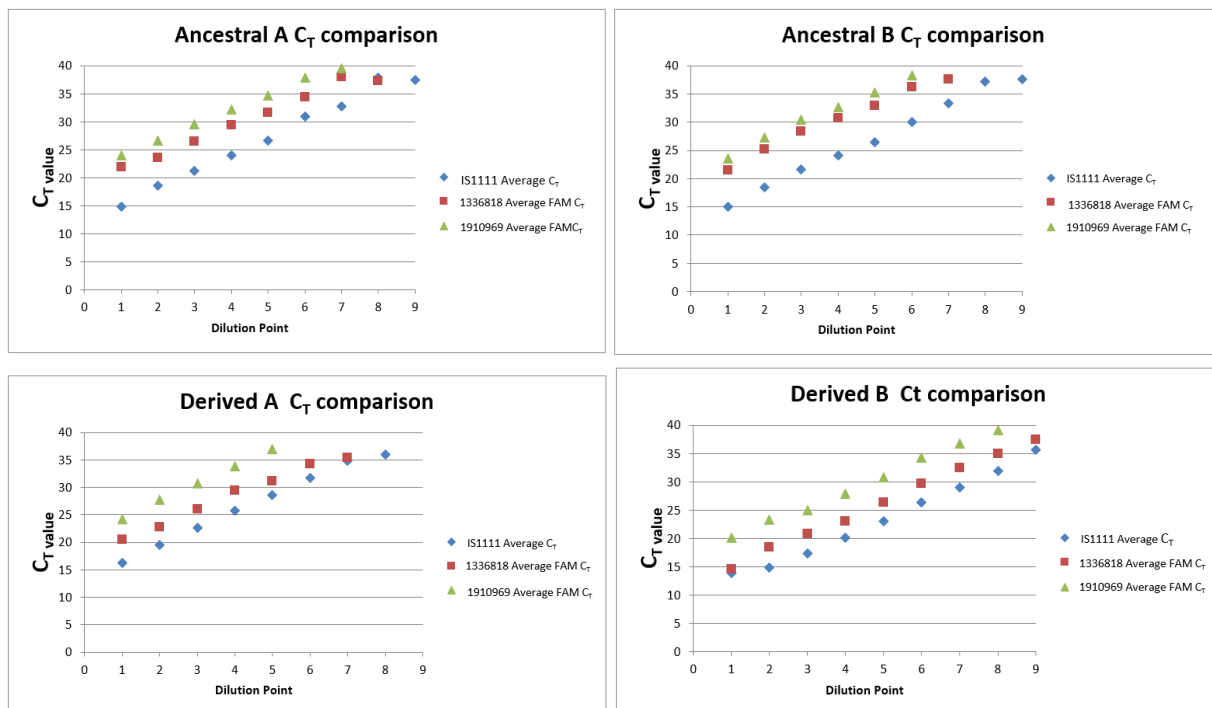

Figure 7: IS1111, Cox1336818, and Cox1910969 average  $C_T$  comparison. Each plot depicts the average  $C_T$  for all amplifying replicates across a ten-fold dilution series of either an

ancestral or derived WGA template when tested with the IS1111 [4], Cox1336818, and Cox1910969 TaqMan assays. For all plots, the blue diamonds indicate the IS1111 average  $C_T$  at each dilution point, the red squares indicate the average  $C_T$  for the probe corresponding to the sample for Cox1336818, and the green triangles indicate the average  $C_T$  for the probe corresponding to the sample for Cox1910969.

### Literature Cited

1. Glazunova O, Roux V, Freylikman O, Sekeyova Z, Fournous G, Tyczka J, Tokarevich N, Kovacava E, Marrie TJ, Raoult D: ***Coxiella burnetii* genotyping**. *Emerg Infect Dis* 2005, **11**(8):1211-1217.
2. Felsenstein J: **Confidence Limits on Phylogenies: An Approach Using the Bootstrap**. *Evolution* 1985, **39**(4):783.
3. Pearson T, Hornstra HM, Hilsabeck R, Gates LT, Olivas SM, Birdsell DM, Hall CM, German S, Cook JM, Seymour ML *et al*: **High prevalence and two dominant host-specific genotypes of *Coxiella burnetii* in U.S. milk**. *BMC Microbiol* 2014, **14**(1):41.
4. Loftis AD, Reeves WK, Szumlas DE, Abbassy MM, Helmy IM, Moriarity JR, Dasch GA: **Rickettsial agents in Egyptian ticks collected from domestic animals**. *Exp Appl Acarol* 2006, **40**(1):67-81.
